# Supplementary material for: Music-Enhanced Analgesia and Antiseizure Activities in Animal Models of Pain and Epilepsy: Toward Preclinical Studies Supporting Development of Digital Therapeutics and Their Combinations With Pharmaceutical Drugs
Source: PubMed Central journal article supplement (PMC6446215; doi:10.3389/fneur.2019.00277), 2019-03-27
Supplement: Table_1.pdf [file Table_1.pdf]

## Supplementary Material

### **Music-enhanced Analgesia and Antiseizure Activities in Animal Models of Pain and Epilepsy: Towards Preclinical Studies Supporting Development of Digital Therapeutics and their Combinations with Pharmaceutical Drugs**

Cameron S Metcalf, Merodean Huntsman, Gerry Garcia, Adam K. Kochanski, Michael Chikinda, Eugene Watanabe, Tristan Underwood, Fabiola Vanegas, Misty D Smith, H Steve White, Grzegorz Bulaj

**Table S1.** Examples of digital interventions approved or cleared by the US Food and Drug Administration as “software as a medical device”, and intended to treat specific chronic medical conditions.

| Name and type of product | Indication                         | Website of the company                                                    |
|--------------------------|------------------------------------|---------------------------------------------------------------------------|
| BlueStar, mobile app     | Diabetes type 2                    | <a href="https://www.welldoc.com/">https://www.welldoc.com/</a>           |
| Music Glove, video game  | Stroke, Traumatic brain injury     | <a href="https://www.flintrehab.com/">https://www.flintrehab.com/</a>     |
| Jintronix. video game    | Stroke, Traumatic brain injury     | <a href="http://www.jintronix.com/">http://www.jintronix.com/</a>         |
| reSET, mobile app        | Substance use disorder, non-opioid | <a href="https://peartherapeutics.com/">https://peartherapeutics.com/</a> |
| reSET-O, mobile app      | Opioid use disorder                | <a href="https://peartherapeutics.com/">https://peartherapeutics.com/</a> |

Note: As of resubmission of this manuscript, digital therapeutic AKL-T01 for the treatment of ADHD (video game Evo developed by Akili Interactive) is under regulatory review from the FDA. Reference: <https://www.akiliinteractive.com/>
